# Supplementary material for: Cation modulation of carbonyldipyrrinone (CDP) fluorescence: emission-ratiometric sensing of calcium
Source: Royal Society of Chemistry journal article supplement (doi:10.1039/b501606a), 2005-01-01
Supplement: b501606a.pdf [file b501606a.pdf]

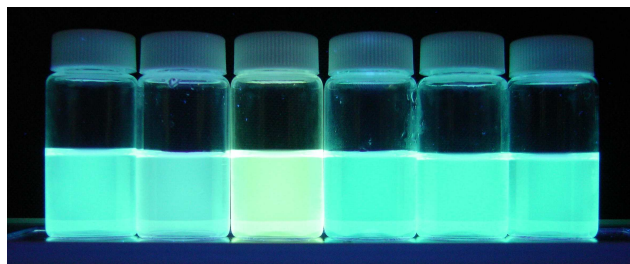

**ESI-Fig 1** Acetonitrile solutions of 10  $\mu\text{M}$  CDP **10** in the presence of 5 mM metal ions. The excitation is by a UV lamp set at 360 nm. The metal ions from left to right are; Zn(II), Mg(II), Ca(II), K(I), Na(I) and Li(I).
